# Supplementary material for: Efficacy and Renal Safety of Prophylactic Tenofovir Alafenamide for HBV-Infected Cancer Patients Undergoing Chemotherapy
Source: MDPI journal article supplement (doi:10.3390/ijms231911335), 2022-09-26
Supplement: s1 [file s1]

**Table S1.** Baseline characteristics of the 686 HBV-infected cancer patients with follow-up more than 1 year

|                                      | ETV<br>(n=417, 60.8%) | TDF<br>(n=149, 21.7%) | TAF<br>(n=120, 17.5%) | <i>p</i> |
|--------------------------------------|-----------------------|-----------------------|-----------------------|----------|
| Age (years)                          | 58.4 ± 11.8           | 56.0 ± 11.8           | 58.6 ± 11.1           | 0.054    |
| Sex (male), n (%)                    | 233 (55.9)            | 71 (47.7)             | 71 (59.2)             | 0.123    |
| Body mass index (kg/m <sup>2</sup> ) | 23.8 ± 3.8            | 23.8 ± 4.6            | 23.6 ± 3.9            | 0.429    |
| Diabetes, n (%)                      | 57 (13.7)             | 22 (14.8)             | 12 (10)               | 0.481    |
| Hypertension, n (%)                  | 101 (24.2)            | 42 (28.2)             | 27 (22.5)             | 0.513    |
| Cancer types, n (%)                  |                       |                       |                       | 0.001    |
| Gastrointestinal cancers             | 81 (19.4)             | 46 (30.9)             | 41 (34.2)             |          |
| Hematological cancers                | 75 (18)               | 12 (8.1)              | 15 (12.5)             |          |
| Lung cancer                          | 65 (15.6)             | 22 (14.8)             | 16 (13.3)             |          |
| Head and neck cancers                | 48 (11.5)             | 22 (14.8)             | 9 (7.5)               |          |
| Breast cancer                        | 54 (12.9)             | 30 (20.1)             | 16 (13.3)             |          |
| Hepatobiliary cancer                 | 17 (4.1)              | 4 (2.7)               | 1 (0.8)               |          |
| Gynecological cancer                 | 31 (7.4)              | 7 (4.7)               | 8 (6.7)               |          |
| Others                               | 46 (11)               | 6 (4)                 | 14 (11.7)             |          |
| Chemotherapy duration (months)       | 11.5 (4.9-22.6)       | 6.1 (4.3-14.7)        | 8.1 (5.0-14.0)        | 0.001    |
| Chemotherapy regimen, n (%)          |                       |                       |                       |          |
| Rituximab-containing                 | 45 (10.8)             | 7 (4.7)               | 10 (8.3)              | 0.080    |
| Platinum-containing                  | 215 (51.6)            | 87 (58.4)             | 69 (57.5)             | 0.253    |
| Cisplatin-containing                 | 136 (32.6)            | 62 (41.6)             | 39 (32.5)             | 0.122    |
| Concurrent radiotherapy              | 113 (27.1)            | 45 (30.2)             | 33 (27.5)             | 0.765    |
| NUC therapy duration (months)        | 16.4 (11.6-25.6)      | 12.5 (9.3-20.2)       | 12.8 (9.4-14.2)       | <0.001   |

|                                                     |                                           |                                  |                                      |        |
|-----------------------------------------------------|-------------------------------------------|----------------------------------|--------------------------------------|--------|
| Ongoing NUCs therapy, n (%)                         | 122 (29.3)                                | 6 (4)                            | 74 (61.7)                            | <0.001 |
| Follow-up period (months)                           | 24.9 (16.9-41.4)                          | 27.8 (18.4-44.7)                 | 14.0 (13.1-15.4)                     | <0.001 |
| Death during follow-up period                       | 86 (20.6)                                 | 41 (27.5)                        | 1 (0.8)                              | <0.001 |
| HBV DNA (Log IU/mL)*                                | 3.03 ± 1.70                               | 2.68 ± 1.38                      | 2.87 ± 1.79                          | 0.034  |
| Undetectable HBV DNA, n (%)*                        | 95 (23.6)                                 | 36 (25.2)                        | 35 (32.4)                            | 0.173  |
| HBV DNA <2000 IU/mL, n (%)*                         | 244 (60.5)                                | 99 (69.2)                        | 71 (65.7)                            | 0.153  |
| HBsAg (Log IU/mL)*                                  | 1.95 ± 1.42                               | 1.73 ± 1.53                      | 2.09 ± 1.42                          | 0.237  |
| HBV status, n (%)                                   |                                           |                                  |                                      | 0.078  |
| HBeAg-positive carrier                              | 13 (3.1)                                  | 4 (2.7)                          | 7 (5.8)                              |        |
| HBeAg-positive chronic hepatitis                    | 9 (2.2)                                   | 0 (0)                            | 1 (0.8)                              |        |
| HBeAg-negative carrier                              | 368 (88.2)                                | 142 (95.3)                       | 107 (89.2)                           |        |
| HBeAg-negative chronic hepatitis                    | 27 (6.5)                                  | 3 (2)                            | 5 (4.2)                              |        |
| BUN (mg/dL)                                         | 15.6 ± 8.8                                | 13.7 ± 4.2                       | 14.0 ± 5.5                           | 0.150  |
| Creatinine (mg/dL)                                  | 0.93 ± 0.56                               | 0.81 ± 0.16                      | 0.83 ± 0.24                          | 0.018  |
| eGFR (mL/min)                                       | 86.2 ± 21.2                               | 91.7 ± 14.6                      | 87.7 ± 17.9                          | 0.072  |
| Chronic kidney disease (CKD) stage 1/2/3/4/5, n (%) | 213/157/41/3/3<br>(51.1/37.6/9.8/0.7/0.7) | 85/60/4/0/0<br>(57/40.3/2.7/0/0) | 62/49/7/2/0<br>(51.7/40.8/5.8/1.7/0) | 0.094  |
| Albumin (g/dL)                                      | 3.82 ± 0.54                               | 3.93 ± 0.43                      | 3.86 ± 0.52                          | 0.146  |
| Total bilirubin (mg/dL)                             | 0.59 ± 0.35                               | 0.58 ± 0.31                      | 0.59 ± 0.33                          | 0.954  |
| ALT (U/L)                                           | 42 ± 97                                   | 25 ± 18                          | 31 ± 34                              | 0.256  |
| AST (U/L)                                           | 35 ± 56                                   | 26 ± 17                          | 28 ± 23                              | 0.052  |

ETV, entecavir; TDF, tenofovir disoproxil fumarate; TAF, tenofovir alafenamide.

\*654 (95.3%) cases had available baseline HBV DNA level.
